# Supplementary material
Source: HighWire-hosted journal article supplement (https://embomolmed.embopress.org/content/5/9/1383)

## **Supplementary information**

### **Targeting androgen receptor promotes prostate cancer metastasis through CCL2 induction via STAT3 activation**

Kouji Izumi, Lei-Ya Fang, Atsushi Mizokami, Mikio Namiki, Lei Li, Wen-Jye Lin and Chawnshang Chang

#### **Table of contents:**

#### **Supplementary figure legends**

#### **Supplementary figures**

**Figure S1:** Cytokine array analysis of the CM isolated from C4-2 scr and siAR cells.

**Figure S2:** qPCR analysis of M2 markers expression in THP-1 cells.

**Figure S3:** Western blot analysis of CCL2, EMT markers, and AR in parental LNCaP and LAPC4 cells after treated with CM of THP-1 scr and siAR, or co-cultured with THP-1 scr and siAR cells for 24 h.

**Figure S4:** Western blot analysis of CCL2, EMT markers, and AR in monoculture LNCaP and LAPC4 cells (scr and siAR).

**Figure S5:** IHC analysis of PIAS3 in TRAMP-C1 xenograft tumors (scr and siAR).

**Supplementary Figure S6:** The clinical information of prostate biopsy samples at diagnosis or CRPC stage.

**Supplementary Figure S7:** IHC analysis of prostate biopsy samples at diagnosis or CRPC stage.

**Supplementary Figure S8:** Gene profiling analyses using public database show increased CCL2 in human PCa tissues and androgen-deprived mouse prostates.

## Supplementary Figure legends

### **Figure S1: Cytokine array analysis of the CM isolated from C4-2 scr and siAR cells.**

CM were collected after 24 h incubation (*left*). Increased CCL2 expression was observed in CM of C4-2 siAR cells (yellow square). The array map is shown at right. Ref=reference spot, Neg=negative control.

### **Figure S2: qPCR analysis of M2 markers expression in THP-1 cells.**

CCL22, MRC1, IL-10 and Arg1 expression in THP-1 scr or THP-1 siAR cells with or without co-cultured with C4-2 cells are shown.

### **Figure S3: Western blot of CCL2, EMT markers, and AR in parental LNCaP and LAPC4**

**cells after treated with CM of THP-1 scr and siAR, or co-cultured with THP-1 scr and siAR cells for 24 h.** Similar regulation with CCL2, EMT markers, and AR in C4-2 cells was noted in LNCaP (*left*) and LAPC4 (*right*) cells co-cultured with THP-1 siAR cells.

### **Figure S4: Western blot analysis of CCL2, EMT markers, and AR in monoculture**

**LNCaP and LAPC4 cells (scr and siAR).** Similar regulation with CCL2, EMT markers, and AR in C4-2 scr and siAR cells was noted in LNCaP scr and siAR (*left*) and LAPC4 scr and siAR (*right*) cells.

### **Figure S5: IHC analysis of PIAS3 in TRAMP-C1 xenograft tumors (scr and siAR).**

The strong staining of PIAS3 in sections of TRAMP-C1 scr tumors is noted (*left*). In contrast, only marginal PIAS3 immunoreactivity in TRAMP-C1 siAR tumors is observed (*right*), suggesting AR silencing in TRAMP-C1 cells reduces the expression of PIAS3 protein. The strong PIAS3 staining in the benign control prostate gland indicates that benign prostate in TRAMP-C1 siAR tumors has not lost PIAS3. Black arrows indicate PIAS3-positive tumor cells. **T**: tumor; **B**: benign gland of anterior prostate.

**Figure S6: The clinical information of prostate biopsy samples at diagnosis and CRPC stage.** **A.** The patient's information from biopsy samples is shown. PSA values at diagnosis and at CRPC stage were statistically analyzed with paired one-tailed t test. TNM=TNM classification by UICC 1997, GS=Gleason score, Dx=diagnosis, Re-Bx=re-biopsy, and N/A=not available. **B.** The number of CD68<sup>+</sup> positive macrophages in prostate biopsy samples collected from patients during diagnosis or developing CRPC stage (*left*). The representative picture shows CD68<sup>+</sup> cells (arrows) in Case E at CRPC stage (*right*).

**Figure S7: IHC analysis of prostate biopsy samples at diagnosis and CRPC stage.** IHC of CCL2, AR, PIAS3, and pSTAT3 in prostate biopsy samples at diagnosis and at CRPC stage are shown, neg=negative; mod=moderate; str=strong. The specimen of PIAS3 in Case C was not available.

**Figure S8: Gene profiling analyses using public database show increased CCL2 in human PCa tissues and androgen-deprived mouse prostates.** **A.** GDS1439 database and **B-H.** GDS2562 database were obtained from the NCBI Gene Expression Omnibus (GEO) website. *Bars, Mean ± SEM.*

# Supplementary Fig. S1

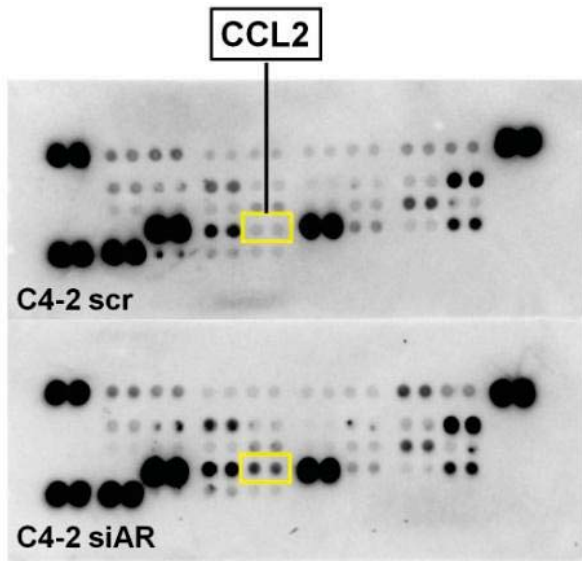

| Ref | C5a            | CD 154       | G-CSF         | GM-CSF  | CXCL 1 | CCL1   | CD54  | IFN- $\gamma$ | Ref |
|-----|----------------|--------------|---------------|---------|--------|--------|-------|---------------|-----|
|     | IL-1 $\alpha$  | IL-1 $\beta$ | IL-1ra        | IL-2    | IL-4   | IL-5   | IL-6  | IL-8          |     |
|     | IL-10          | IL-12p70     | IL-13         | IL-16   | IL-17  | IL-17E | IL-23 | IL-27         |     |
|     | IL-32 $\alpha$ | CXCL 10      | CXCL 11       | CCL2    | MIF    | CCL3   | CCL4  | PAI-1         |     |
| Ref | CCL5           | SDF-1        | TNF- $\alpha$ | TREM -1 |        |        |       |               | Neg |

## Supplementary Fig. S2

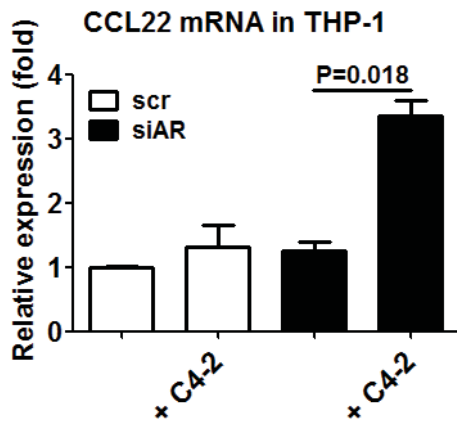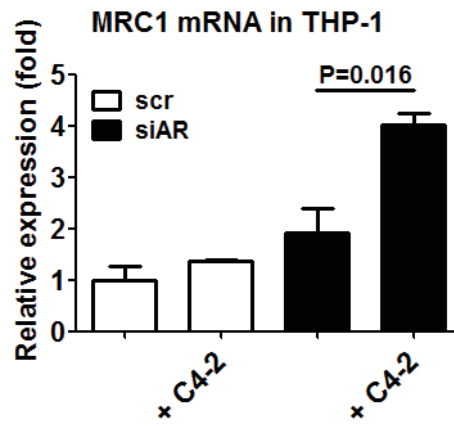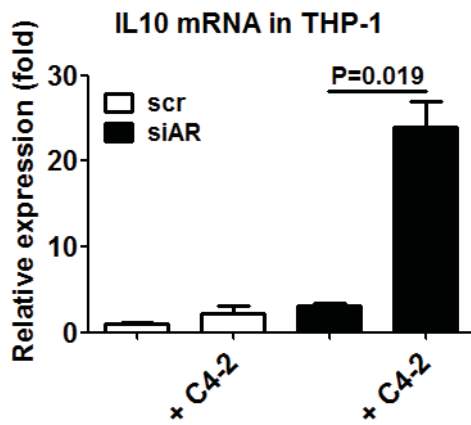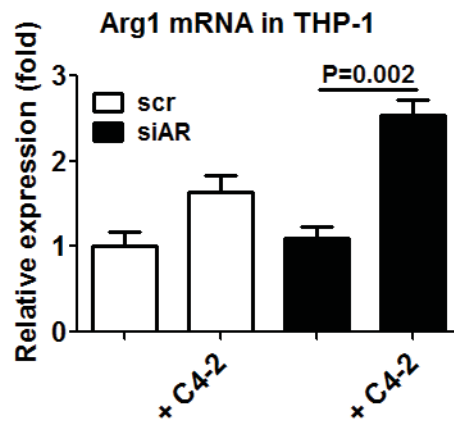

# Supplementary Fig. S3

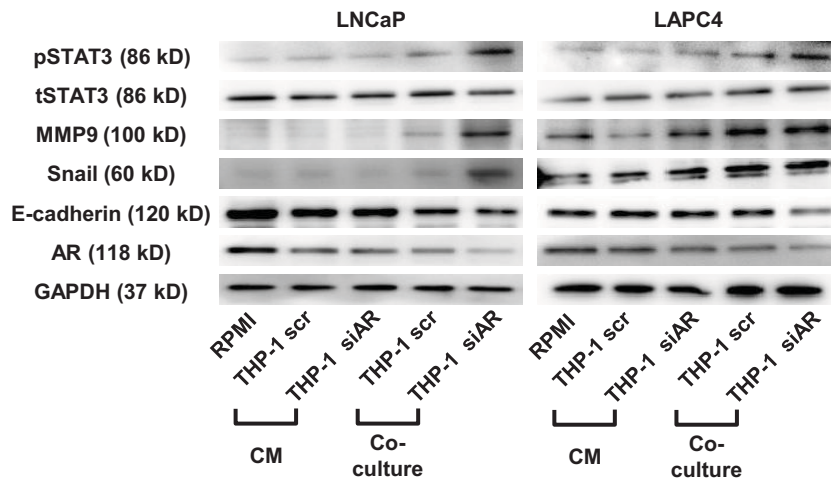

# Supplementary Fig. S4

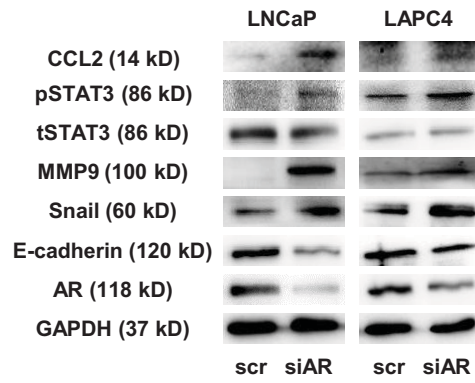

# Supplementary Fig. S5

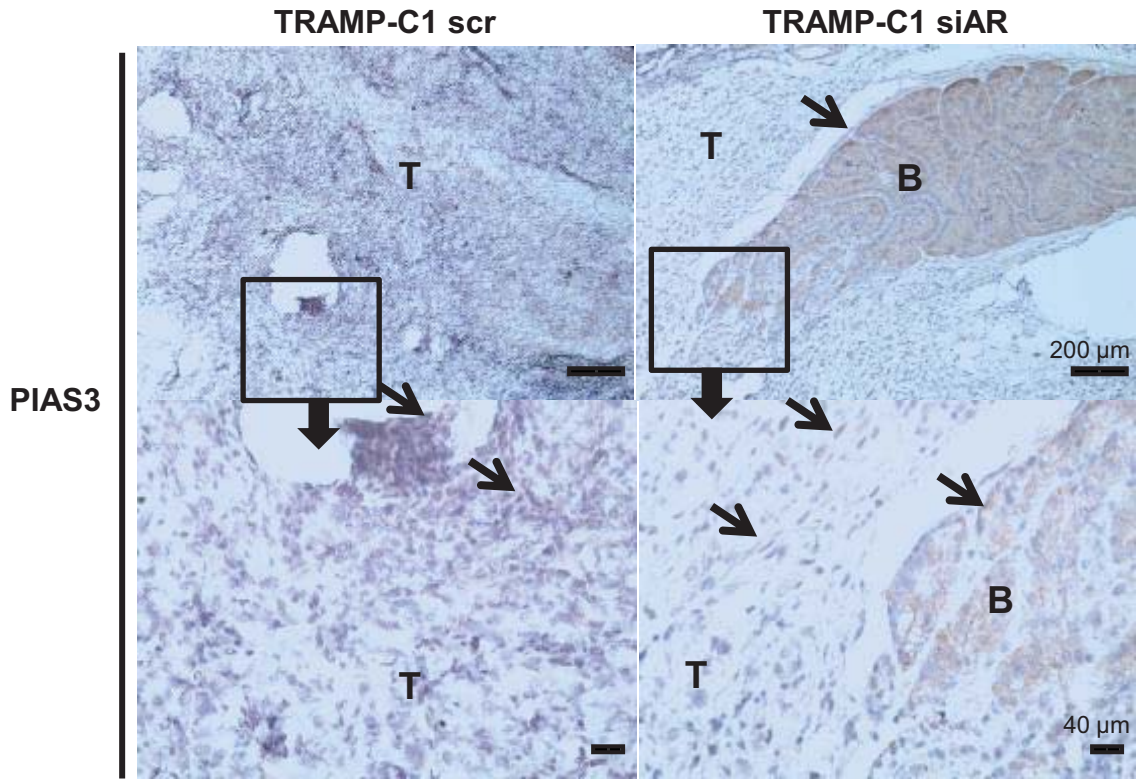



# Supplementary Fig. S6

**A**

|             |           | Case A  | Case B | Case C  | Case D  | Case E |
|-------------|-----------|---------|--------|---------|---------|--------|
| Age (year)  | at Dx     | 53      | 64     | 72      | 73      | N/A    |
|             | at Re-Bx  | 57      | 68     | 76      | 77      | 80     |
| PSA (ng/ml) | at Dx     | 46.4    | 196.6  | 71      | 246     | N/A    |
|             | at Re-Bx* | 0.017   | 11.326 | 0.194   | 198.079 | 185.25 |
| TNM         | at Dx     | T3aN1M0 | T4N1M0 | T3aN0M0 | T4N0M1b | N/A    |
| GS          | at Dx     | 3+4     | 5+5    | 4+4     | 4+5     | N/A    |

\*P=0.038

**B**

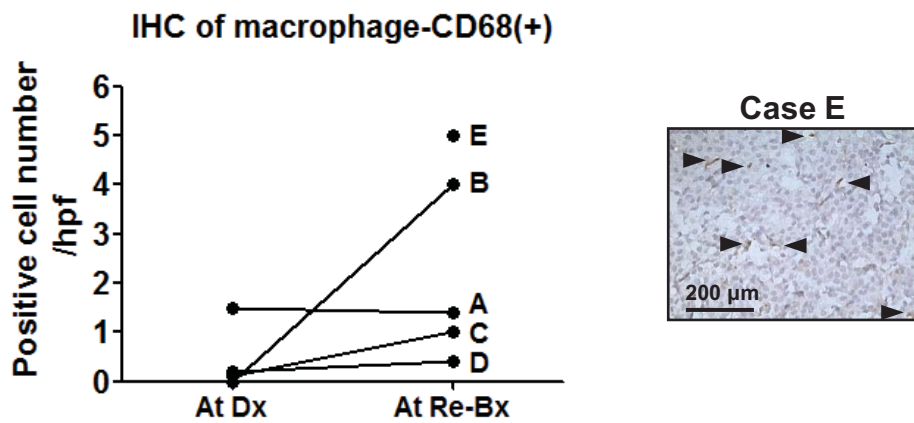

# Supplementary Fig. S7

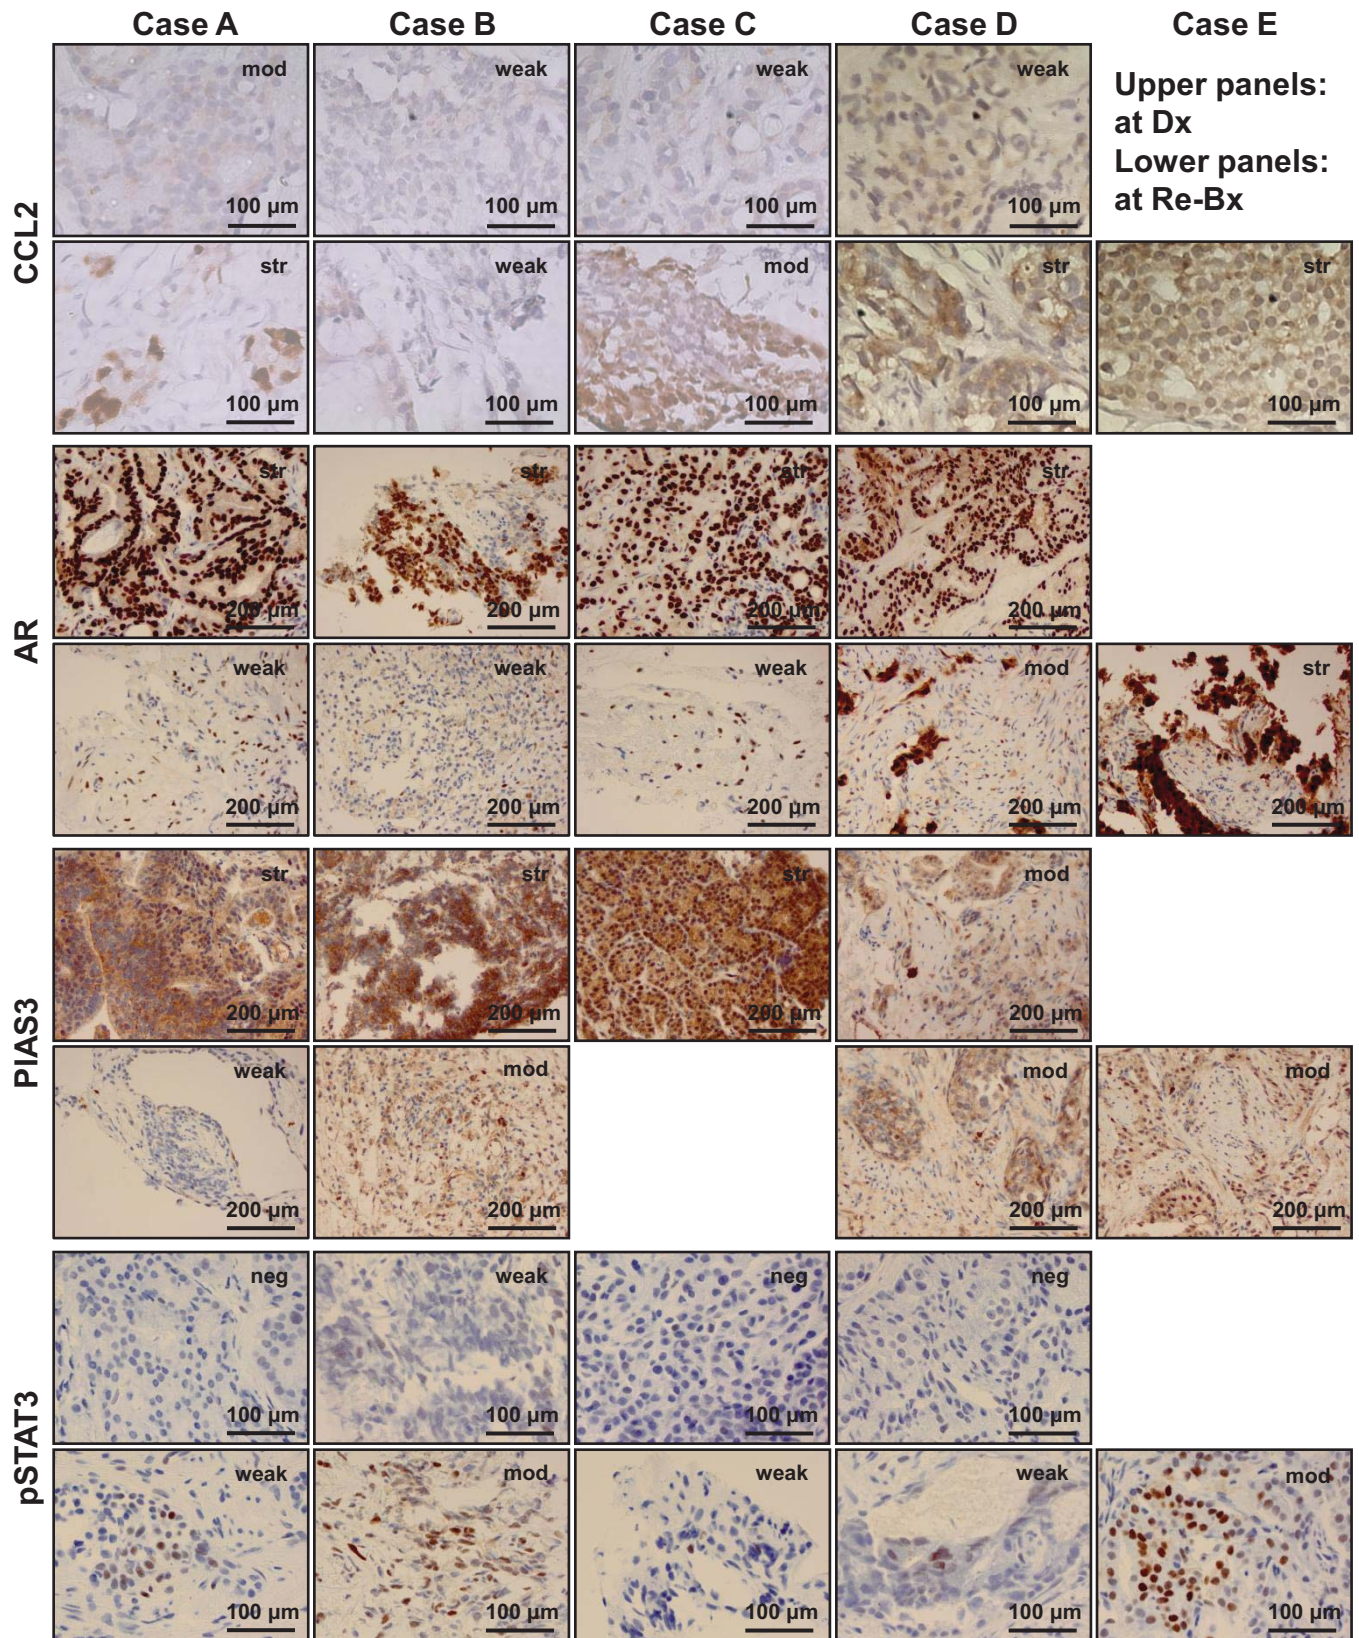

# Supplementary Fig. S8

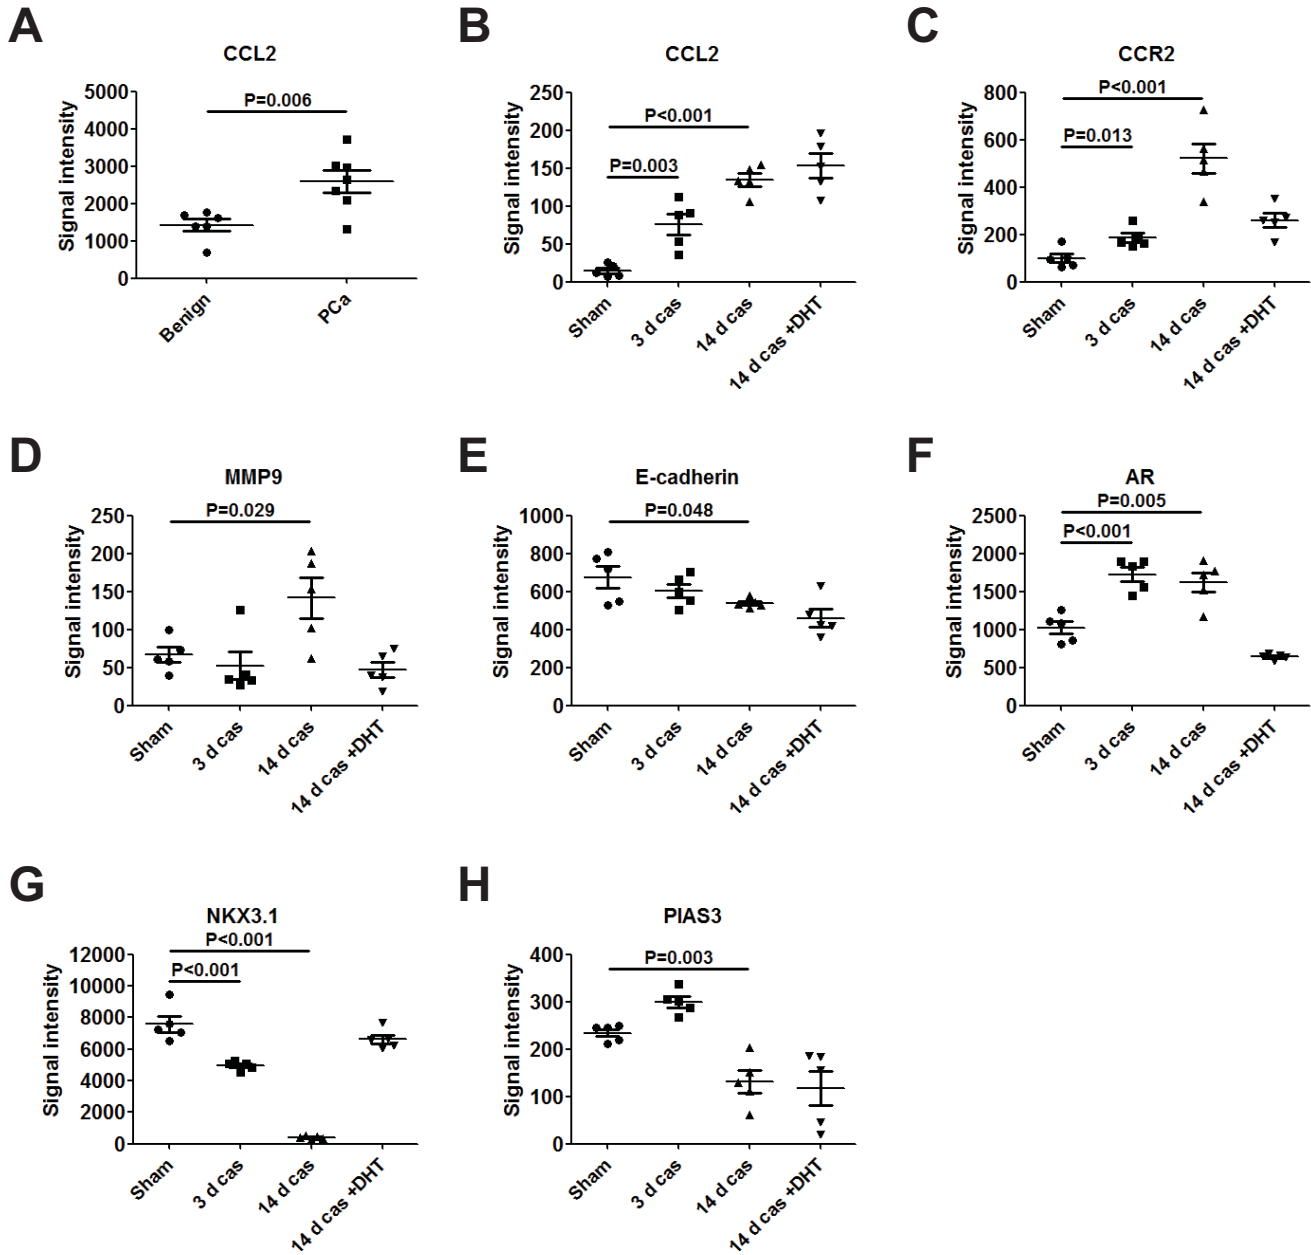

Supplement: inline-supplementary-material-1 [file inline-supplementary-material-1.pdf]
